# Supplementary material for: Methanolic Extract of Rhizoma Coptidis Inhibits the Early Viral Entry Steps of Hepatitis C Virus Infection
Source: PubMed Central journal article supplement (PMC6315547; doi:10.3390/v10120669), 2018-11-27
Supplement: viruses-10-00669-s001.pdf [file viruses-10-00669-s001.pdf]

## Supplementary Material

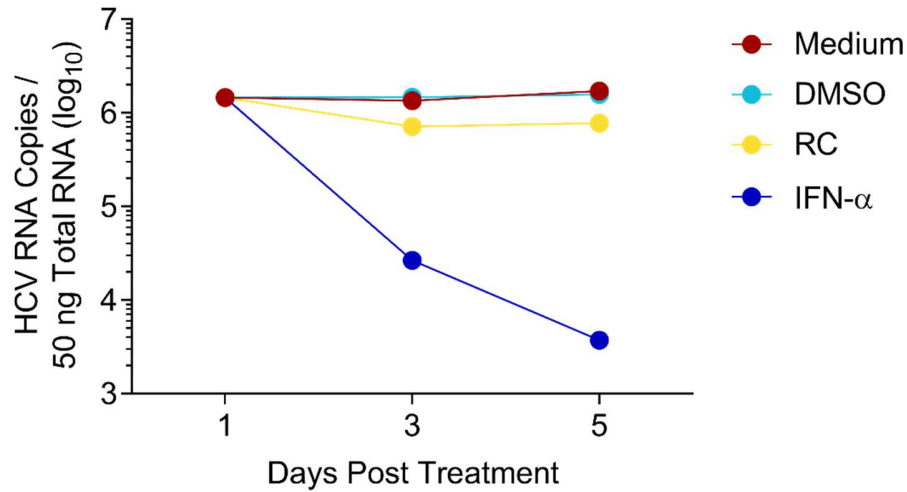

**Figure S1. Effect of RC treatment on HCV subgenomic replicon cells.** The sbJFH1-B2 subgenomic replicon cells (JFH1; genotype 2a) [23] were treated with or without RC (20  $\mu\text{g}/\text{mL}$ ) for 1, 3, and 5 days before harvesting the cells and extracting total RNA using TRIzol (Invitrogen). Quantitation of HCV genome by qRT-PCR (input of 50 ng of total cellular RNA per sample) was performed as previously described [23]. DMSO = 0.5%; IFN- $\alpha$  (800 IU/mL) served as positive control.
